# Supplementary material for: Modeling the Novel Coronavirus (SARS-CoV-2) Outbreak in Sicily, Italy
Source: PubMed Central journal article supplement (PMC7400186; doi:10.3390/ijerph17144964), 2020-07-09
Supplement: ijerph-17-04964-s001.pdf [file ijerph-17-04964-s001.pdf]

## Supplementary Materials

# Modeling the Novel Coronavirus (SARS-CoV-2) outbreak in Sicily, Italy

Andrea Maugeri <sup>1</sup>, Martina Barchitta <sup>1</sup>, Sebastiano Battiato <sup>2</sup> and Antonella Agodi <sup>1,3,\*</sup>

<sup>1</sup> Department of Medical and Surgical Sciences and Advanced Technologies “GF Ingrassia”, University of Catania, 95123, Catania, Italy

<sup>2</sup> Department of Mathematics and Computer Science, University of Catania, 95123, Catania, Italy

<sup>3</sup> Azienda Ospedaliero-Universitaria “Policlinico-Vittorio Emanuele”, 95123 Catania, Italy

\* Correspondence: [agodia@unict.it](mailto:agodia@unict.it)

### Index

- **Figure S1.** Summary of data collection, model formulation and fitting
- **Table S1.** Extract of data of SARS-CoV-2 cases in Sicily (Italy), reported by the Italy’s Civil Protection from 24 February to 13 April, 2020

**Figure S1.** Summary of data collection, model formulation and fitting

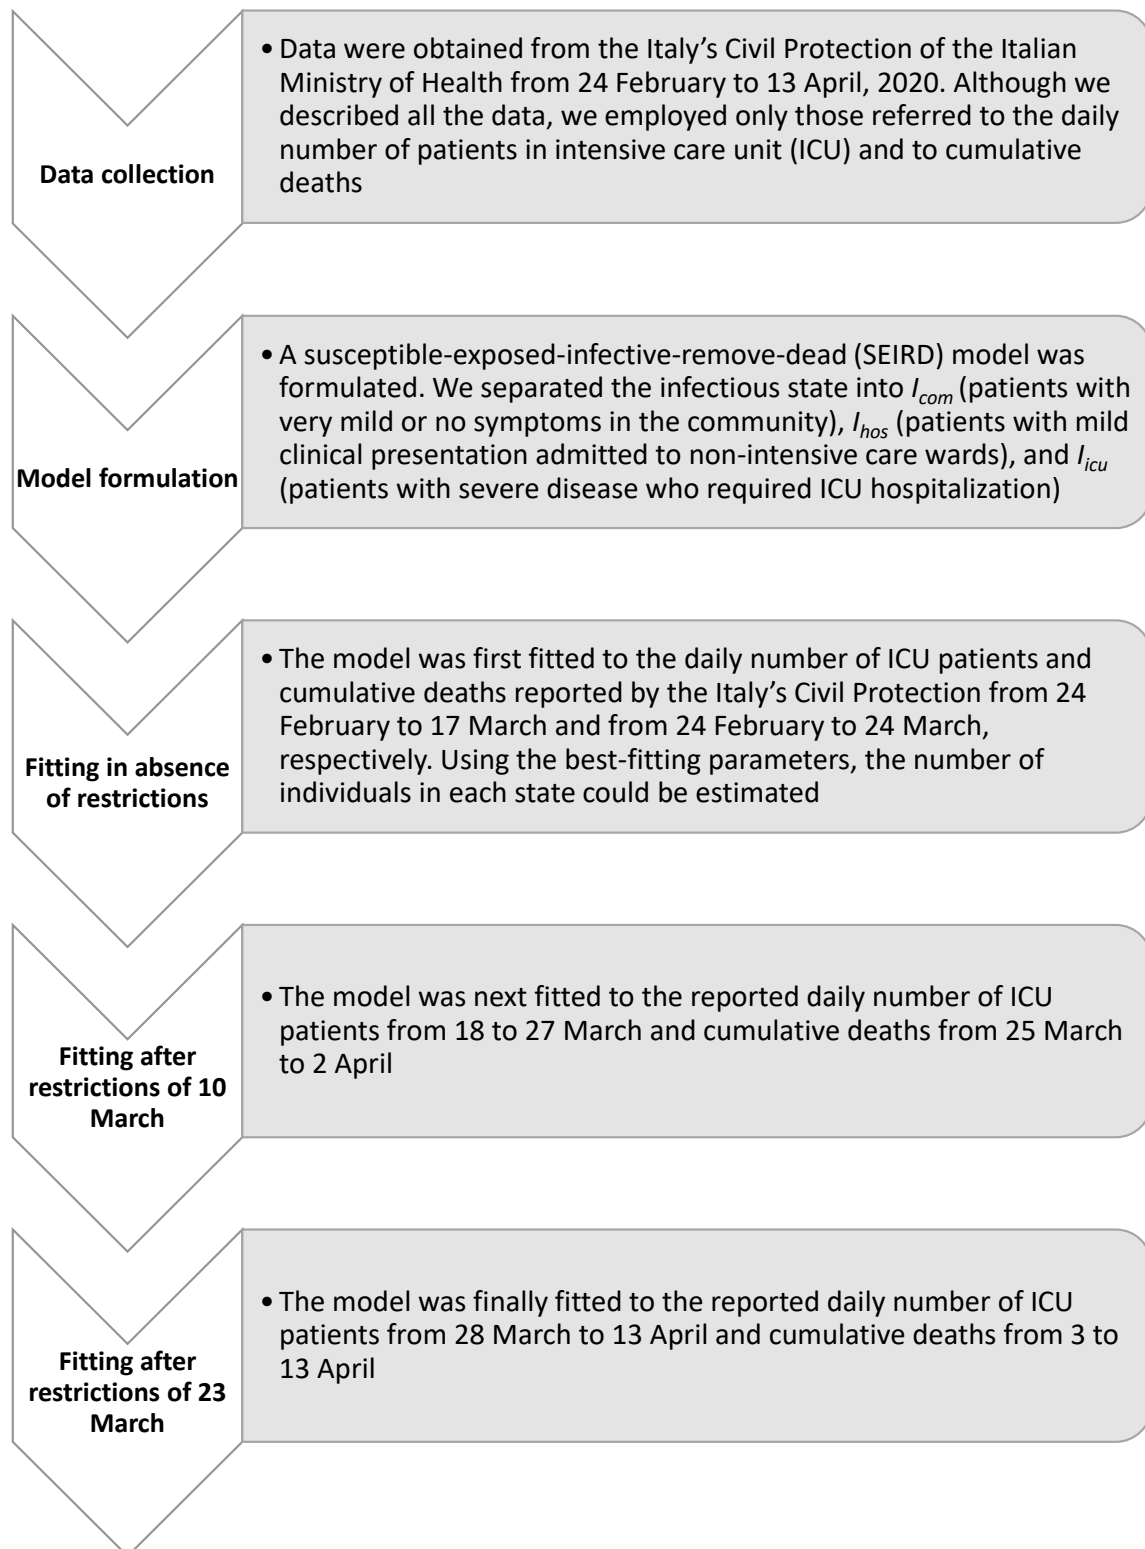

**Table S1.** Extract of data on SARS-CoV-2 cases in Sicily (Italy), reported by the Italy's Civil Protection from 24 February to 13 April, 2020

| Date      | Hospitalized in non-intensive care wards <sup>a</sup> | Hospitalized in Intensive Care Unit <sup>a,b</sup> | Total hospitalized patients <sup>a</sup> | Non-hospitalized patients <sup>a</sup> | Recovered <sup>a</sup> | Deaths <sup>a,b</sup> | Total cases <sup>a</sup> |
|-----------|-------------------------------------------------------|----------------------------------------------------|------------------------------------------|----------------------------------------|------------------------|-----------------------|--------------------------|
| 24-Feb-20 | 0                                                     | 0                                                  | 0                                        | 0                                      | 0                      | 0                     | 0                        |
| 25-Feb-20 | 1                                                     | 0                                                  | 1                                        | 2                                      | 0                      | 0                     | 3                        |
| 26-Feb-20 | 1                                                     | 0                                                  | 1                                        | 2                                      | 0                      | 0                     | 3                        |
| 27-Feb-20 | 1                                                     | 0                                                  | 1                                        | 1                                      | 2                      | 0                     | 4                        |
| 28-Feb-20 | 1                                                     | 0                                                  | 1                                        | 1                                      | 2                      | 0                     | 4                        |
| 29-Feb-20 | 1                                                     | 0                                                  | 1                                        | 1                                      | 2                      | 0                     | 4                        |
| 1-Mar-20  | 1                                                     | 0                                                  | 1                                        | 6                                      | 2                      | 0                     | 9                        |
| 2-Mar-20  | 2                                                     | 0                                                  | 2                                        | 3                                      | 2                      | 0                     | 7                        |
| 3-Mar-20  | 2                                                     | 0                                                  | 2                                        | 3                                      | 2                      | 0                     | 7                        |
| 4-Mar-20  | 5                                                     | 0                                                  | 5                                        | 11                                     | 2                      | 0                     | 18                       |
| 5-Mar-20  | 5                                                     | 0                                                  | 5                                        | 11                                     | 2                      | 0                     | 18                       |
| 6-Mar-20  | 7                                                     | 0                                                  | 7                                        | 15                                     | 2                      | 0                     | 24                       |
| 7-Mar-20  | 8                                                     | 0                                                  | 8                                        | 25                                     | 2                      | 0                     | 35                       |
| 8-Mar-20  | 18                                                    | 0                                                  | 18                                       | 33                                     | 2                      | 0                     | 53                       |
| 9-Mar-20  | 19                                                    | 0                                                  | 19                                       | 33                                     | 2                      | 0                     | 54                       |
| 10-Mar-20 | 17                                                    | 2                                                  | 19                                       | 41                                     | 2                      | 0                     | 62                       |
| 11-Mar-20 | 23                                                    | 1                                                  | 24                                       | 57                                     | 2                      | 0                     | 83                       |
| 12-Mar-20 | 28                                                    | 5                                                  | 33                                       | 78                                     | 2                      | 2                     | 115                      |
| 13-Mar-20 | 37                                                    | 7                                                  | 44                                       | 82                                     | 2                      | 2                     | 130                      |
| 14-Mar-20 | 42                                                    | 11                                                 | 53                                       | 97                                     | 4                      | 2                     | 156                      |
| 15-Mar-20 | 56                                                    | 15                                                 | 71                                       | 108                                    | 7                      | 2                     | 188                      |
| 16-Mar-20 | 75                                                    | 20                                                 | 95                                       | 108                                    | 8                      | 2                     | 213                      |
| 17-Mar-20 | 86                                                    | 28                                                 | 114                                      | 112                                    | 8                      | 3                     | 237                      |
| 18-Mar-20 | 100                                                   | 29                                                 | 129                                      | 138                                    | 12                     | 3                     | 282                      |
| 19-Mar-20 | 143                                                   | 36                                                 | 179                                      | 142                                    | 15                     | 4                     | 340                      |
| 20-Mar-20 | 168                                                   | 42                                                 | 210                                      | 169                                    | 25                     | 4                     | 408                      |
| 21-Mar-20 | 206                                                   | 48                                                 | 254                                      | 204                                    | 26                     | 6                     | 490                      |
| 22-Mar-20 | 220                                                   | 55                                                 | 275                                      | 321                                    | 26                     | 8                     | 630                      |
| 23-Mar-20 | 250                                                   | 60                                                 | 310                                      | 371                                    | 27                     | 13                    | 721                      |
| 24-Mar-20 | 250                                                   | 60                                                 | 310                                      | 489                                    | 27                     | 20                    | 846                      |
| 25-Mar-20 | 259                                                   | 80                                                 | 339                                      | 597                                    | 33                     | 25                    | 994                      |
| 26-Mar-20 | 346                                                   | 68                                                 | 414                                      | 681                                    | 36                     | 33                    | 1164                     |
| 27-Mar-20 | 425                                                   | 75                                                 | 500                                      | 658                                    | 53                     | 39                    | 1250                     |
| 28-Mar-20 | 441                                                   | 71                                                 | 512                                      | 730                                    | 60                     | 57                    | 1359                     |
| 29-Mar-20 | 451                                                   | 71                                                 | 522                                      | 808                                    | 65                     | 65                    | 1460                     |
| 30-Mar-20 | 484                                                   | 75                                                 | 559                                      | 849                                    | 71                     | 76                    | 1555                     |
| 31-Mar-20 | 503                                                   | 72                                                 | 575                                      | 917                                    | 74                     | 81                    | 1647                     |

|                  |     |    |     |      |     |     |      |
|------------------|-----|----|-----|------|-----|-----|------|
| <b>1-Apr-20</b>  | 496 | 72 | 568 | 976  | 86  | 88  | 1718 |
| <b>2-Apr-20</b>  | 503 | 73 | 576 | 1030 | 92  | 93  | 1791 |
| <b>3-Apr-20</b>  | 535 | 73 | 608 | 1056 | 94  | 101 | 1859 |
| <b>4-Apr-20</b>  | 553 | 74 | 627 | 1099 | 95  | 111 | 1932 |
| <b>5-Apr-20</b>  | 556 | 76 | 632 | 1142 | 104 | 116 | 1994 |
| <b>6-Apr-20</b>  | 563 | 74 | 637 | 1178 | 108 | 123 | 2046 |
| <b>7-Apr-20</b>  | 562 | 73 | 635 | 1224 | 113 | 125 | 2097 |
| <b>8-Apr-20</b>  | 563 | 65 | 628 | 1265 | 133 | 133 | 2159 |
| <b>9-Apr-20</b>  | 566 | 63 | 629 | 1313 | 152 | 138 | 2232 |
| <b>10-Apr-20</b> | 568 | 62 | 630 | 1337 | 187 | 148 | 2302 |
| <b>11-Apr-20</b> | 562 | 58 | 620 | 1381 | 209 | 154 | 2364 |
| <b>12-Apr-20</b> | 552 | 53 | 605 | 1425 | 223 | 163 | 2416 |
| <b>13-Apr-20</b> | 554 | 51 | 605 | 1445 | 237 | 171 | 2458 |

<sup>a</sup> These data are described in Figure 2 reported in the main text

<sup>b</sup> These data are used to fit the Susceptible-Exposed-Infectious-Recovered-Dead (SEIRD) model

**Table S2.** Best-fitting parameters in the sensitivity analysis.

| <b>Modeling period</b>                                  | <b>SEIRD Parameters</b>                                 | <b>Estimated values (95%CI)</b> |
|---------------------------------------------------------|---------------------------------------------------------|---------------------------------|
| <b>In absence of control measures</b>                   | $\beta_{com}$                                           | 0.99 (0.96 – 1.04)              |
|                                                         | $\beta_{hos}$                                           | 0.37 (0.32 – 0.43)              |
|                                                         | $\beta_{icu}$                                           | 0.28 (0.24 – 0.33)              |
|                                                         | $\nu_{com}$                                             | 0.76 (0.70– 0.82)               |
|                                                         | $\nu_{hos}$                                             | 0.19 (0.15 – 0.23)              |
|                                                         | $\nu_{icu}$                                             | 0.05 (0.03 – 0.07)              |
|                                                         | $\mu_{com}$                                             | 0.01 (0.00 – 0.02)              |
|                                                         | $\mu_{hos}$                                             | 0.07 (0.04 – 0.10)              |
|                                                         | $\mu_{icu}$                                             | 0.26 (0.20 – 0.30)              |
|                                                         | <b>After restrictions adopted on 10<br/>March, 2020</b> | $\beta_{com}$                   |
| $\beta_{hos}$                                           |                                                         | 0.34 (0.33 – 0.35)              |
| $\beta_{icu}$                                           |                                                         | 0.25 (0.23 – 0.27)              |
| <b>After restrictions adopted on 23<br/>March, 2020</b> | $\beta_{com}$                                           | 0.20 (0.11– 0.30)               |
|                                                         | $\beta_{hos}$                                           | 0.28 (0.25 – 0.31)              |
|                                                         | $\beta_{icu}$                                           | 0.22 (0.20 – 0.25)              |
